# Supplementary material for: Solvothermal synthesis of Mn-doped CsPbCl3 perovskite nanocrystals with tunable morphology and their size-dependent optical properties
Source: Royal Society of Chemistry journal article supplement (doi:10.1039/c9ra08289a), 2019-01-01
Supplement: c9ra08289a1.pdf [file c9ra08289a1.pdf]

Electronic Supplementary Information (ESI) for

Solvothermal synthesis of Mn-doped CsPbCl<sub>3</sub> perovskite  
nanocrystals with tunable morphology and their size-  
dependent optical properties

*Chang Liu,<sup>a, b</sup> Jing Lin, \*,<sup>a, b</sup> Wei Zhai,<sup>a, b</sup> Zhikai Wen,<sup>a, b</sup> Xin He,<sup>a, b</sup> Mengmeng Yu,<sup>a, b</sup>  
Yang Huang, \*,<sup>a, b</sup> Zhonglu Guo,<sup>a, b</sup> Chao Yu, \*,<sup>a, b</sup> and Chengchun Tang<sup>a, b</sup>*

<sup>a</sup> School of Materials Science and Engineering, Hebei University of Technology, Tianjin  
300130, P. R. China

<sup>b</sup> Hebei Key Laboratory of Boron Nitride Micro and Nano Materials, Hebei University of  
Technology, Tianjin 300130, P. R. China

\*To whom correspondence should be addressed: E-mail: [linjing@hebut.edu.cn](mailto:linjing@hebut.edu.cn) (J. Lin),  
[huangyang@hebut.edu.cn](mailto:huangyang@hebut.edu.cn) (Y. Huang), [yuchao20130426@126.com](mailto:yuchao20130426@126.com) (C. Yu)

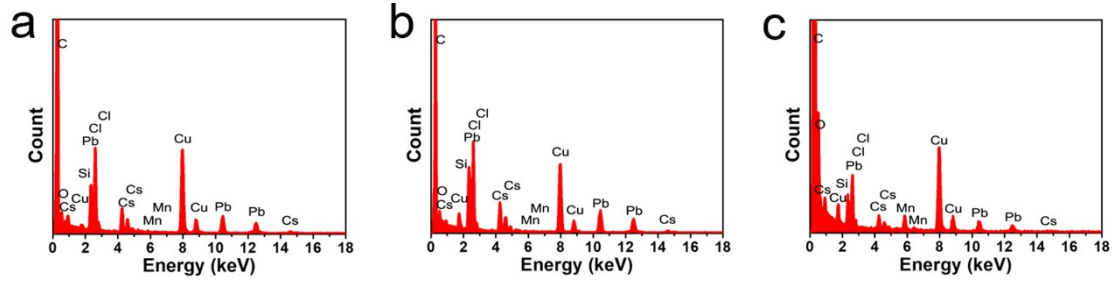

**Fig. S1** EDX spectra of Mn-doped CsPbCl<sub>3</sub> QDs prepared with different Mn-to-Pb molar feed ratios: (a) 5:1, (b) 7.5:1, and (c) 10:1. The compositions are CsPb<sub>0.94</sub>Mn<sub>0.06</sub>Cl<sub>3</sub>, CsPb<sub>0.85</sub>Mn<sub>0.15</sub>Cl<sub>3</sub> and CsPb<sub>0.75</sub>Mn<sub>0.25</sub>Cl<sub>3</sub>, respectively.

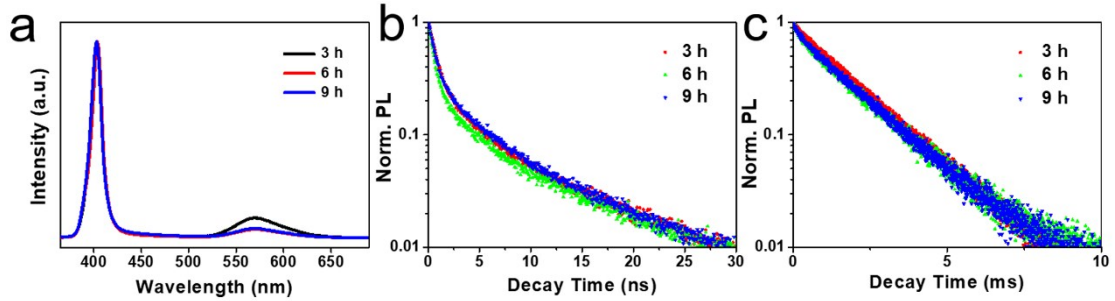

**Fig. S2** (a) Normalized PL spectra, (b) exciton PL lifetime and (c) Mn<sup>2+</sup> luminescence lifetime of Mn-doped CsPbCl<sub>3</sub> QDs prepared under different reaction times (with a same Mn-to-Pb molar feed ratio of 5:1 at 120 °C).

**Method for the calculation of average lifetime:** To reveal the mechanism of luminescence and energy transfer process in Mn-doped CsPbCl<sub>3</sub> NCs, the time-resolved PL spectrum was investigated. As observed in both Mn-doped CsPbCl<sub>3</sub> QDs and NPLs, the lifetimes of Mn<sup>2+</sup> emission can be fitted by single-exponential relation:  $I(t) = A + B \cdot \exp(-t/\tau_1)$

while the lifetimes of exciton emission can be fitted well by double-exponential relation:  $I(t) = A + B_1 \cdot \exp(-t/\tau_1) + B_2 \cdot \exp(-t/\tau_2)$

Thus, the average lifetime of exciton emission  $\tau_{ave}$  can be calculated as follows:

$$\tau_{ave} = \frac{\sum_i^n B_i T_i}{\sum_{i=1}^n B_i} = \frac{\sum_i^n B_i}{\sum_{i=1}^n B_i} T_i$$

in which  $B_i$  are amplitudes of each components, and  $\tau_1$ ,  $\tau_2$  are the corresponding lifetime constants.<sup>1</sup>

**Table S1.** Summary of PLQYs and PL lifetimes of Mn-doped CsPbCl<sub>3</sub> QDs prepared under different reaction times (with a same Mn-to-Pb molar feed ratio of 5:1 at 120 °C).

| Reaction time | PLQY | Exciton avg. lifetime | Mn <sup>2+</sup> avg. lifetime |
|---------------|------|-----------------------|--------------------------------|
| 3 h           | 6%   | 2.32 ns               | 1.77 ms                        |
| 6 h           | 4.8% | 1.66 ns               | 1.38 ms                        |
| 9 h           | 5.9% | 2.23 ns               | 1.44 ms                        |

**Table S2.** Detailed amplitude and corresponding lifetime data for exciton emission decay curves.

| Reaction time | B <sub>1</sub> | $\tau_1$ (ns) | B <sub>2</sub> | $\tau_2$ (ns) | $\tau_{ex}$ (ns) |
|---------------|----------------|---------------|----------------|---------------|------------------|
| 3 h           | 0.68           | 0.58          | 0.32           | 6.02          | 2.32             |
| 6 h           | 0.77           | 0.44          | 0.23           | 5.65          | 1.66             |
| 9 h           | 0.69           | 0.55          | 0.31           | 5.93          | 2.23             |

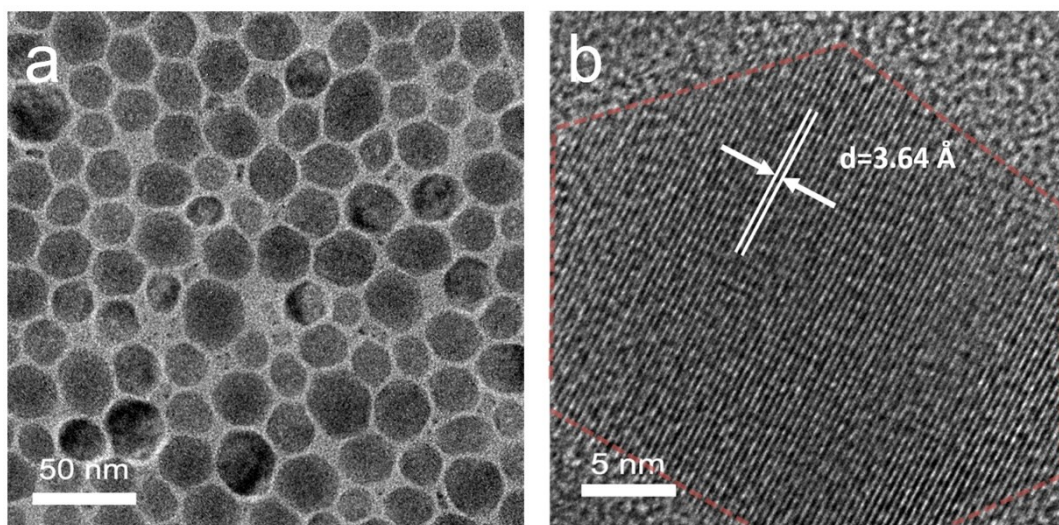

**Fig. S3** (a) TEM and (b) HRTEM image of CsMnCl<sub>3</sub> NCs formed by a spinodal decomposition process. The CsMnCl<sub>3</sub> NCs exhibit hexagon morphology with sizes of 16-32 nm. The interplanar lattice distance of 3.64 Å corresponds to the (104) plane of h-CsMnCl<sub>3</sub> or the (110) plane of r-CsMnCl<sub>3</sub>.

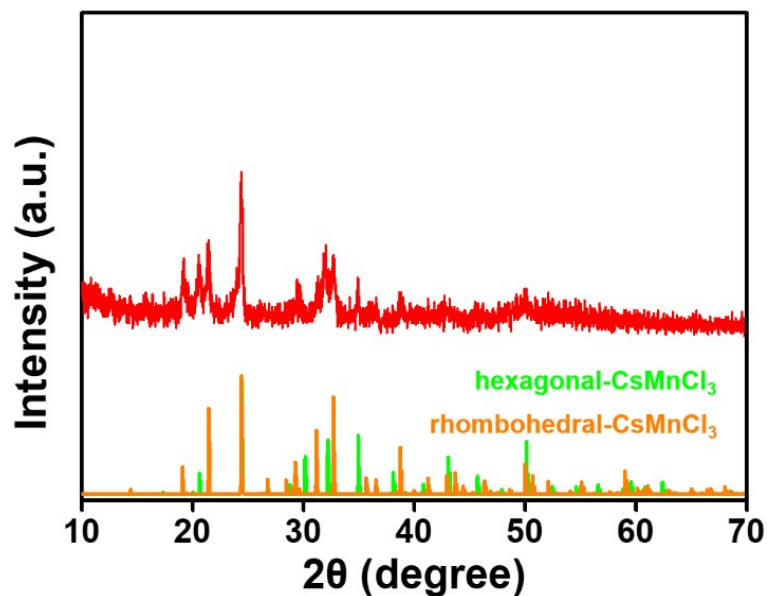

**Fig. S4** XRD pattern of the sample prepared after a prolonged reaction time over 12 h (with a Mn-to-Pb molar feed ratio of 10:1), indicating that the host  $\text{CsPbCl}_3$  structure was nearly destroyed and phase of  $\text{CsMnCl}_3$  was precipitated instead.

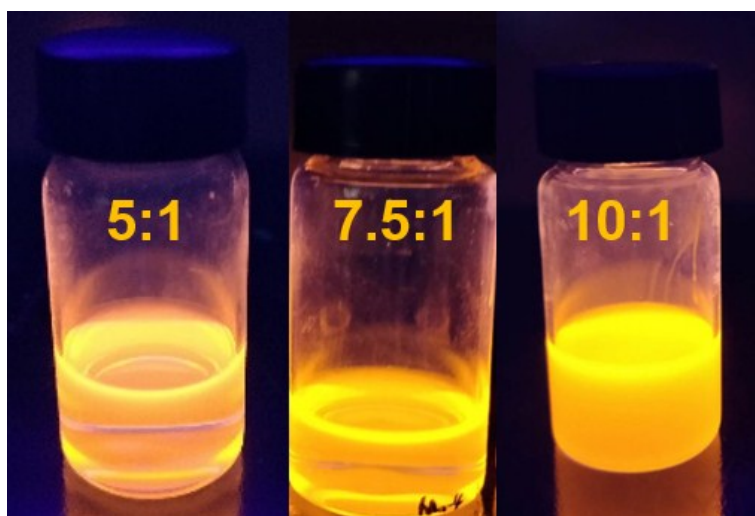

**Fig. S5** Photographs of Mn-doped  $\text{CsPbCl}_3$  QDs prepared with different Mn-to-Pb molar feed ratios (under a 365 nm UV light).

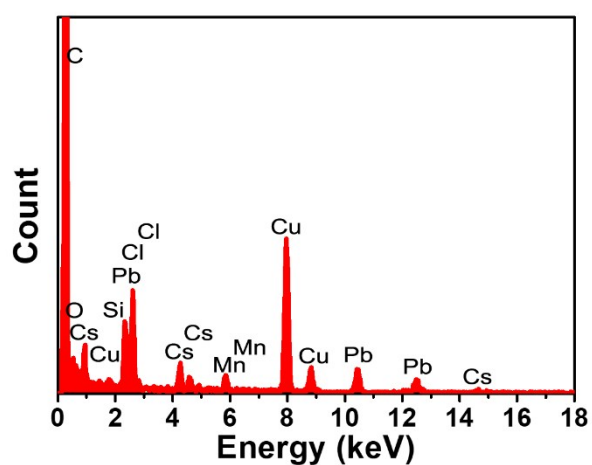

**Fig. S6** EDX spectrum of Mn-doped  $\text{CsPbCl}_3$  NPLs prepared under a solvothermal reaction time of 4.5 h (with Mn-to-Pb feed ratio of 5:1).

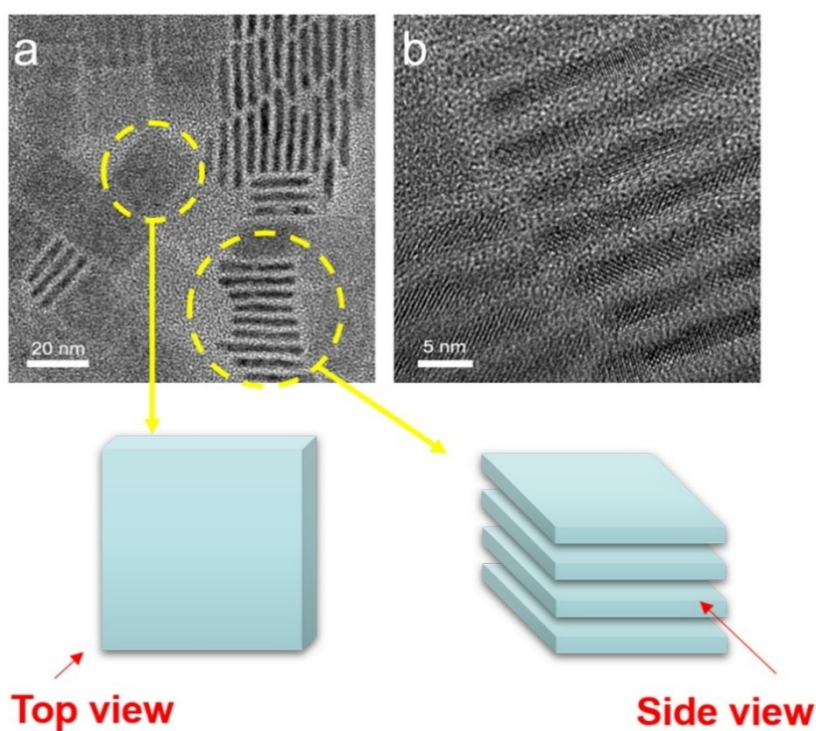

**Fig. S7** (a) TEM and (b) HRTEM image of ultrathin Mn-doped  $\text{CsPbCl}_3$  NPLs with a thickness of 2 nm (using 3 mL of OA and OLA).

## Reference

- 1 A. Sillen, and Y. Engelborghs, Photochem. Photobio., 1998, **67**, 475-486.
